# Supplementary material for: Thrombopoietin mutation in congenital amegakaryocytic thrombocytopenia treatable with romiplostim
Source: PubMed Central journal article supplement (PMC5760853; doi:10.15252/emmm.201708168), 2017-11-30
Supplement: EMMM-10-63-s001.pdf [file EMMM-10-63-s001.pdf]

**Manuscript “Thrombopoietin mutation in congenital amegakaryocytic thrombocytopenia treatable with romiplostim” by Pecci et al.**

## **APPENDIX**

### **TABLE OF CONTENTS**

**Appendix Table S1.** Exact *P*-values for data reported in Figure 2

**Appendix Table S2.** Exact *P*-values for data reported in Figure 3

**Appendix Table S3.** Exact *P*-values for data reported in Figure 4

**Appendix Table S4.** Exact *P*-values for data reported in Figure 5

**Appendix Table S5.** Exact *P*-values for data reported in Figure 6

**Appendix Table S1. Exact *P*-values for data reported in Figure 2**

| <b>Data reported in Panel B</b> |                            |                       |
|---------------------------------|----------------------------|-----------------------|
|                                 |                            | <b><i>P</i>-VALUE</b> |
| <b>FLAG/Actin ratio (a.u.)</b>  | p.R119C compared to WT     | 0.0014                |
|                                 | p.R38C compared to WT      | 0.0195                |
| <b>THPO/Actin ratio (a.u.)</b>  | p.R119C compared to WT     | 0.0482                |
|                                 | p.R38C compared to WT      | 0.0136                |
| <b>Data reported in Panel D</b> |                            |                       |
|                                 |                            | <b><i>P</i>-VALUE</b> |
| <b>FLAG/Actin ratio (a.u.)</b>  | p.R119C compared to WT 24h | 0.0016                |
|                                 | p.R119C compared to WT 48h | 0.0693                |
|                                 | p.R38C compared to WT 24h  | 0.0033                |
|                                 | p.R38C compared to WT 48h  | 0.0082                |
| <b>THPO/Actin ratio (a.u.)</b>  | p.R119C compared to WT 24h | 0.0206                |
|                                 | p.R119C compared to WT 48h | 0.0431                |
|                                 | p.R38C compared to WT 24h  | 0.0152                |
|                                 | p.R38C compared to WT 48h  | 0.0153                |

**Appendix Table S2. Exact *P*-values for data reported in Figure 3**

|                                                                             |                        | <b><i>P</i>-VALUE</b> |
|-----------------------------------------------------------------------------|------------------------|-----------------------|
| <b>Cell proliferation with THPO-conditioned media 0.5 <math>\mu</math>l</b> | p.R119C compared to WT | 0.00019               |
|                                                                             | p.R38C compared to WT  | 0.0014                |
| <b>Cell proliferation with THPO-conditioned media 1.0 <math>\mu</math>l</b> | p.R119C compared to WT | 0.0005                |
|                                                                             | p.R38C compared to WT  | 0.0005                |

**Appendix Table S3. Exact *P*-values for data reported in Figure 4**

| Data reported in Panel B               |                            |     |                       |
|----------------------------------------|----------------------------|-----|-----------------------|
|                                        |                            |     | <b><i>P</i>-VALUE</b> |
| <b>Relative protein THPO/GAPDH (%)</b> | WT CHX compared to WT DMSO | 8h  | 8.800E-05             |
|                                        |                            | 24h | 0.012                 |
|                                        |                            | 48h | 0.0006                |

**Appendix Table S4. Exact *P*-values for data reported in Figure 5**

|                                                  |                        | <b><i>P</i>-VALUE</b> |
|--------------------------------------------------|------------------------|-----------------------|
| <b>Cell proliferation with THPO 60 pg/mL</b>     | p.R119C compared to WT | 0.0175                |
|                                                  | p.R38C compared to WT  | 0.0146                |
| <b>Cell proliferation with 120 pg/mL of THPO</b> | p.R119C compared to WT | 0.0162                |
|                                                  | p.R38C compared to WT  | 0.0218                |
| <b>Cell proliferation with 240 pg/mL of THPO</b> | p.R119C compared to WT | 0.0043                |
|                                                  | p.R38C compared to WT  | 0.0012                |

Appendix Table S5. Exact *P*-values for data reported in Figure 6

| Data reported in Panel B |                                                           |                        |                       |
|--------------------------|-----------------------------------------------------------|------------------------|-----------------------|
|                          |                                                           |                        | <b><i>P</i>-VALUE</b> |
| <b>pSTAT5/STAT5</b>      | <b>THPO-conditioned supernatant 0.5 <math>\mu</math>l</b> | p.R119C compared to WT | 0.0001                |
|                          |                                                           | p.R38C compared to WT  | 0.0001                |
|                          | <b>THPO 240 <math>\mu</math>g/mL</b>                      | p.R119C compared to WT | 0.0002                |
|                          |                                                           | p.R38C compared to WT  | 0.014                 |
| <b>pAKT/AKT</b>          | <b>THPO-conditioned supernatant 0.5 <math>\mu</math>l</b> | p.R119C compared to WT | 0.009                 |
|                          |                                                           | p.R38C compared to WT  | 0.005                 |
|                          | <b>THPO 240 <math>\mu</math>g/mL</b>                      | p.R119C compared to WT | 0.040                 |
|                          |                                                           | p.R38C compared to WT  | 0.011                 |
| <b>pERK/ERK</b>          | <b>THPO-conditioned supernatant 0.5 <math>\mu</math>l</b> | p.R119C compared to WT | 0.007                 |
|                          |                                                           | p.R38C compared to WT  | 0.009                 |
|                          | <b>THPO 240 <math>\mu</math>g/mL</b>                      | p.R119C compared to WT | 0.024                 |
|                          |                                                           | p.R38C compared to WT  | 0.030                 |
